# Supplementary material for: Vascular Density of Deep, Intermediate and Superficial Vascular Plexuses Are Differentially Affected by Diabetic Retinopathy Severity
Source: PubMed Central journal article supplement — Invest Ophthalmol Vis Sci. 2020 Aug 31;61(10):53. doi: 10.1167/iovs.61.10.53 (PMC7463180; doi:10.1167/iovs.61.10.53), 2020-08-31
Supplement: iovs-61-10-53_s001.pdf [file iovs-61-10-53_s001.pdf]

Supplementary Table 1. Decreasing vessel density (VD) and vessel length density (VLD) with increasing diabetic retinopathy severity.

|                                                      | Vessel Density (VD) |                      |                            |                          |               | Vessel Length Density (VLD) |                      |                            |                         |               |
|------------------------------------------------------|---------------------|----------------------|----------------------------|--------------------------|---------------|-----------------------------|----------------------|----------------------------|-------------------------|---------------|
|                                                      | No DR<br>(n=64)     | Mild NPDR<br>(n=107) | Moderate<br>NPDR<br>(n=84) | Severe<br>NPDR<br>(n=48) | PDR<br>(n=93) | No DR<br>(n=64)             | Mild NPDR<br>(n=107) | Moderate<br>NPDR<br>(n=84) | Severe<br>PDR<br>(n=48) | PDR<br>(n=93) |
| VD SCP (%)                                           | 36.85±2.93          | 35.45±3.31           | 34.14±3.38                 | 32.52±3.52               | 30.93±3.75    | 18.49±1.62                  | 17.59±1.83           | 16.80±1.83                 | 15.79±1.84              | 15.31±2.24    |
| VD ICP (%)                                           | 35.78±2.94          | 33.12±2.96           | 31.96±2.90                 | 31.26±3.75               | 30.23±3.14    | 18.58±1.64                  | 16.85±1.65           | 16.20±1.67                 | 15.82±2.10              | 15.12±1.63    |
| VD DCP (%)                                           | 37.52±3.60          | 34.18±3.20           | 33.74±3.22                 | 33.18±4.17               | 31.02±3.23    | 19.72±2.20                  | 17.54±1.86           | 17.22±1.90                 | 16.80±2.26              | 15.65±1.86    |
| p-values for pairwise comparisons with No DR         |                     |                      |                            |                          |               |                             |                      |                            |                         |               |
| SCP                                                  |                     | 1                    | <0.001                     | <0.001                   | <0.001        |                             | 0.503                | <0.001                     | <0.001                  | <0.001        |
| ICP                                                  |                     | <0.001               | <0.001                     | <0.001                   | <0.001        |                             | <0.001               | <0.001                     | <0.001                  | <0.001        |
| DCP                                                  |                     | <0.001               | <0.001                     | <0.001                   | <0.001        |                             | <0.001               | <0.001                     | <0.001                  | <0.001        |
| p-values for pairwise comparisons with mild NPDR     |                     |                      |                            |                          |               |                             |                      |                            |                         |               |
| SCP                                                  |                     |                      | 0.008                      | <0.001                   | <0.001        |                             |                      | 0.003                      | <0.001                  | <0.001        |
| ICP                                                  |                     |                      | 0.199                      | 0.051                    | <0.001        |                             |                      | 0.157                      | 0.031                   | <0.001        |
| DCP                                                  |                     |                      | 1.000                      | 0.241                    | <0.001        |                             |                      | 1.000                      | 0.058                   | <0.001        |
| p-values for pairwise comparisons with moderate NPDR |                     |                      |                            |                          |               |                             |                      |                            |                         |               |
| SCP                                                  |                     |                      |                            | 0.066                    | <0.001        |                             |                      |                            | 0.019                   | <0.001        |
| ICP                                                  |                     |                      |                            | 1                        | 0.002         |                             |                      |                            | 1                       | <0.001        |
| DCP                                                  |                     |                      |                            | 1                        | <0.001        |                             |                      |                            | 0.873                   | <0.001        |
| p-values for pairwise comparisons with severe NPDR   |                     |                      |                            |                          |               |                             |                      |                            |                         |               |
| SCP                                                  |                     |                      |                            |                          | 0.157         |                             |                      |                            |                         | 0.322         |
| ICP                                                  |                     |                      |                            |                          | 0.177         |                             |                      |                            |                         | 0.077         |
| DCP                                                  |                     |                      |                            |                          | 0.022         |                             |                      |                            |                         | 0.054         |

Mixed models correcting for correlation of two eyes, CST, Age, SSI, SE and duration of DM. P value is Bonferonni adjusted with significance being <0.05. SCP; superficial capillary plexus, ICP; intermediate capillary plexus, DCP; deep capillary plexus, VD; vessel density, VLD; vessel length density

Supplementary Table 2: Vessel density and vessel length density in eyes with early DR

|                | No DR<br>(n=64) | Very Mild NPDR<br>(H/MA<5)<br>(n=36) | Mild NPDR<br>(H/MA≥5)<br>(n=71) | P-value<br>No DR vs Very<br>Mild NPDR | P-value<br>No DR vs Mild<br>NPDR | P-value<br>Very Mild vs<br>Mild NPDR |
|----------------|-----------------|--------------------------------------|---------------------------------|---------------------------------------|----------------------------------|--------------------------------------|
| VD SCP<br>(%)  | 36.85±2.93      | 35.86±2.83                           | 35.86±3.52                      | 1.00                                  | 0.29                             | 0.94                                 |
| VLD SCP<br>(%) | 18.49±1.62      | 17.82±1.46                           | 17.47±1.99                      | 1.00                                  | 0.14                             | 0.89                                 |
| VD ICP<br>(%)  | 35.78±2.94      | 33.54±2.84                           | 32.91±3.01                      | <0.001                                | <0.001                           | 1.00                                 |
| VLD ICP<br>(%) | 18.58±1.64      | 17.17±1.66                           | 16.94±1.63                      | <0.001                                | <0.001                           | 1.00                                 |
| VD DCP<br>(%)  | 37.52±3.60      | 35.70±2.83                           | 33.70±2.83                      | 0.009                                 | <0.001                           | 0.15                                 |
| VLD DCP<br>(%) | 19.72±2.20      | 18.06±2.15                           | 17.27±1.65                      | 0.003                                 | <0.001                           | 0.13                                 |

<sup>a</sup> Mixed models correcting for correlation between two eyes, CST, Age, SE, SSI and duration of DM. P value is Bonferonni adjusted with significance being <0.05.

<sup>b</sup> NPDR; nonproliferative diabetic retinopathy, DR; Diabetic retinopathy SCP; superficial capillary plexus, ICP; intermediate capillary plexus, DCP; deep capillary plexus, VD; vessel density, VLD; vessel length density, H/MA; hemorrhages microaneurysms

Supplementary Table 3. Changes in FAZ area with increasing DR severity.

|                                                                        | FAZ area        |                      |                            |                          |               | FAZ acircularity |                      |                            |                         |               |
|------------------------------------------------------------------------|-----------------|----------------------|----------------------------|--------------------------|---------------|------------------|----------------------|----------------------------|-------------------------|---------------|
|                                                                        | No DR<br>(n=64) | Mild NPDR<br>(n=107) | Moderate<br>NPDR<br>(n=84) | Severe<br>NPDR<br>(n=48) | PDR<br>(n=93) | No DR<br>(n=64)  | Mild NPDR<br>(n=107) | Moderate<br>NPDR<br>(n=84) | Severe<br>PDR<br>(n=48) | PDR<br>(n=93) |
| <b>Measurements</b>                                                    | 0.26±0.11       | 0.28±0.12            | 0.30±0.13                  | 0.30±0.15                | 0.33±0.16     | 1.16±0.05        | 1.18±0.08            | 1.19±0.07                  | 1.22±0.09               | 1.21±0.16     |
| <b>p-values for<br/>pairwise<br/>comparison with<br/>No DR</b>         |                 | 1.00                 | 0.32                       | 0.16                     | 0.02          |                  | 1                    | 1                          | 0.32                    | 0.05          |
| <b>p-values for<br/>pairwise<br/>comparison with<br/>mild NPDR</b>     |                 |                      | 1                          | 1                        | 0.194         |                  |                      | 1                          | 1                       | 0.322         |
| <b>p-values for<br/>pairwise<br/>comparison with<br/>moderate NDPR</b> |                 |                      |                            | 1                        | 1             |                  |                      |                            | 1                       | 0.65          |
| <b>p-values for<br/>pairwise<br/>comparison with<br/>severe NPDR</b>   |                 |                      |                            |                          | 1             |                  |                      |                            |                         | 1             |

Mixed models correcting for correlation of two eyes, CST, Age, SSI, SE and duration of DM. P value is Bonferonni adjusted with significance being <0.05. SCP.  
Overall for FAZ without pairwise comparison p=0.016

Supplementary Table 4. Sensitivity analysis evaluating the effects of FAZ area on vessel density measurements.

|                                                      | Vessel Density whole image (%)<br>(Vascularized area/total area)* |                      |                            |                          |               | Vessel Density whole image excluding FAZ (%)<br>(Vascularized area/(total area - FAZ))** |                      |                            |                         |               |
|------------------------------------------------------|-------------------------------------------------------------------|----------------------|----------------------------|--------------------------|---------------|------------------------------------------------------------------------------------------|----------------------|----------------------------|-------------------------|---------------|
|                                                      | No DR<br>(n=64)                                                   | Mild NPDR<br>(n=107) | Moderate<br>NPDR<br>(n=84) | Severe<br>NPDR<br>(n=48) | PDR<br>(n=93) | No DR<br>(n=64)                                                                          | Mild NPDR<br>(n=107) | Moderate<br>NPDR<br>(n=84) | Severe<br>PDR<br>(n=48) | PDR<br>(n=93) |
| SCP                                                  | 36.85±2.93                                                        | 35.45±3.31           | 34.14±3.38                 | 32.52±3.52               | 30.93±3.75    | 38.02±2.87                                                                               | 36.57±3.32           | 35.31±3.29                 | 33.62±3.58              | 32.30±3.68    |
| ICP                                                  | 35.78±2.94                                                        | 33.12±2.96           | 31.96±2.90                 | 31.26±3.75               | 30.23±3.14    | 36.90±3.01                                                                               | 34.18±3.06           | 33.08±2.96                 | 32.20±3.96              | 31.36±3.18    |
| DCP                                                  | 37.52±3.60                                                        | 34.18±3.20           | 33.74±3.22                 | 33.18±4.17               | 31.02±3.23    | 38.47±3.61                                                                               | 35.26±3.20           | 34.91±3.20                 | 34.22±4.37              | 32.11±3.42    |
| p-values for pairwise comparisons with No DR         |                                                                   |                      |                            |                          |               |                                                                                          |                      |                            |                         |               |
| SCP                                                  |                                                                   | 1                    | 0.001                      | <0.001                   | <0.001        |                                                                                          | 1                    | 0.001                      | <0.001                  | <0.001        |
| ICP                                                  |                                                                   | <0.001               | <0.001                     | <0.001                   | <0.001        |                                                                                          | <0.001               | <0.001                     | <0.001                  | <0.001        |
| DCP                                                  |                                                                   | <0.001               | <0.001                     | <0.001                   | <0.001        |                                                                                          | <0.001               | <0.001                     | <0.001                  | <0.001        |
| p-values for pairwise comparisons with mild NPDR     |                                                                   |                      |                            |                          |               |                                                                                          |                      |                            |                         |               |
| SCP                                                  |                                                                   |                      | 0.021                      | <0.001                   | <0.001        |                                                                                          |                      | 0.024                      | <0.001                  | <0.001        |
| ICP                                                  |                                                                   |                      | 0.093                      | 0.004                    | <0.001        |                                                                                          |                      | 0.131                      | 0.007                   | <0.001        |
| DCP                                                  |                                                                   |                      | 1.000                      | 0.117                    | <0.001        |                                                                                          |                      | 1                          | 0.187                   | <0.001        |
| p-values for pairwise comparisons with moderate NPDR |                                                                   |                      |                            |                          |               |                                                                                          |                      |                            |                         |               |
| SCP                                                  |                                                                   |                      |                            | 0.181                    | <0.001        |                                                                                          |                      |                            | 0.182                   | <0.001        |
| ICP                                                  |                                                                   |                      |                            | 1                        | <0.001        |                                                                                          |                      |                            | 1                       | <0.001        |
| DCP                                                  |                                                                   |                      |                            | 0.765                    | <0.001        |                                                                                          |                      |                            | 0.866                   | <0.001        |
| p-values for pairwise comparisons with severe NPDR   |                                                                   |                      |                            |                          |               |                                                                                          |                      |                            |                         |               |
| SCP                                                  |                                                                   |                      |                            |                          | 0.292         |                                                                                          |                      |                            |                         | 0.287         |
| ICP                                                  |                                                                   |                      |                            |                          | 0.419         |                                                                                          |                      |                            |                         | 0.426         |
| DCP                                                  |                                                                   |                      |                            |                          | 0.105         |                                                                                          |                      |                            |                         | 0.104         |

\*Mixed models correcting for correlation of two eyes, CST, Age, SSI, SE, **FAZ area** and duration of DM.

\*\* Mixed models correcting for correlation of two eyes, CST, Age, SSI, SE, and duration of DM.

P value is Bonferonni adjusted with significance being <0.05. SCP; superficial capillary plexus, ICP; intermediate capillary plexus, DCP; deep capillary plexus, VD; vessel density, VLD; vessel length density

Supplementary Table 5: Vascular layer correlation for individual retinopathy severity levels.

|               | SCP vs ICP     | SCP vs DCP      | ICP vs DCP     |
|---------------|----------------|-----------------|----------------|
| Overall       | r 0.44, p<0.01 | r 0.33, p<0.01  | r 0.66, p<0.01 |
| No DR         | r 0.33, p=0.01 | r <0.01, p=1.00 | r 0.48, p<0.01 |
| Mild NPDR     | r 0.22, p=0.03 | r 0.21, p=0.04  | r 0.50, p<0.01 |
| Moderate NPDR | r 0.25, p=0.02 | r 0.19, p=0.08  | r 0.59, p<0.01 |
| Severe NPDR   | r 0.26, p=0.07 | r 0.02, p=0.89  | r 0.44, p<0.01 |
| PDR untreated | r 0.33, p=0.04 | r 0.14, p=0.40  | r 0.60, p<0.01 |
| PDR treated   | r 0.24, p=0.08 | r 0.04, p=0.76  | r 0.62, p<0.01 |

SCP; superficial capillary plexus, ICP; intermediate capillary plexus, DCP; deep capillary plexus; DR; diabetic retinopathy, NPDR; non-proliferative diabetic retinopathy, PDR; proliferative diabetic retinopathy
